# Supplementary material for: Multimodal system for recording individual-level behaviors in songbird groups
Source: PeerJ journal article supplement (doi:10.7717/peerj.20203), 2025-11-10
Supplement: BirdParkSoftwareVisualization.pdf [file BirdParkSoftwareVisualization.pdf]

## Illustrations of the BirdPark Software Suite

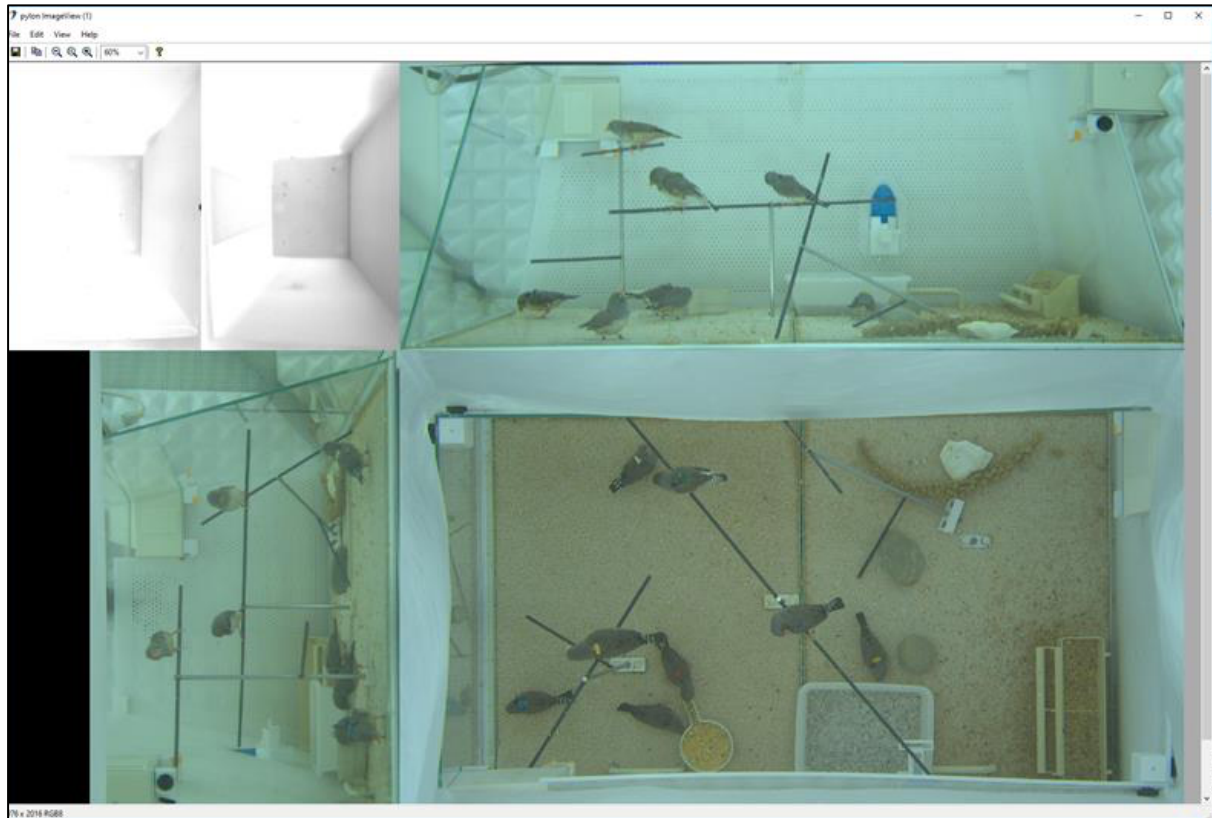

**Figure A: Live video monitor of BirdVideo.** The monitor displays in real time the composite video frames generated from 3 chamber cameras (side, back, and top views) and from two nest box cameras (top left).

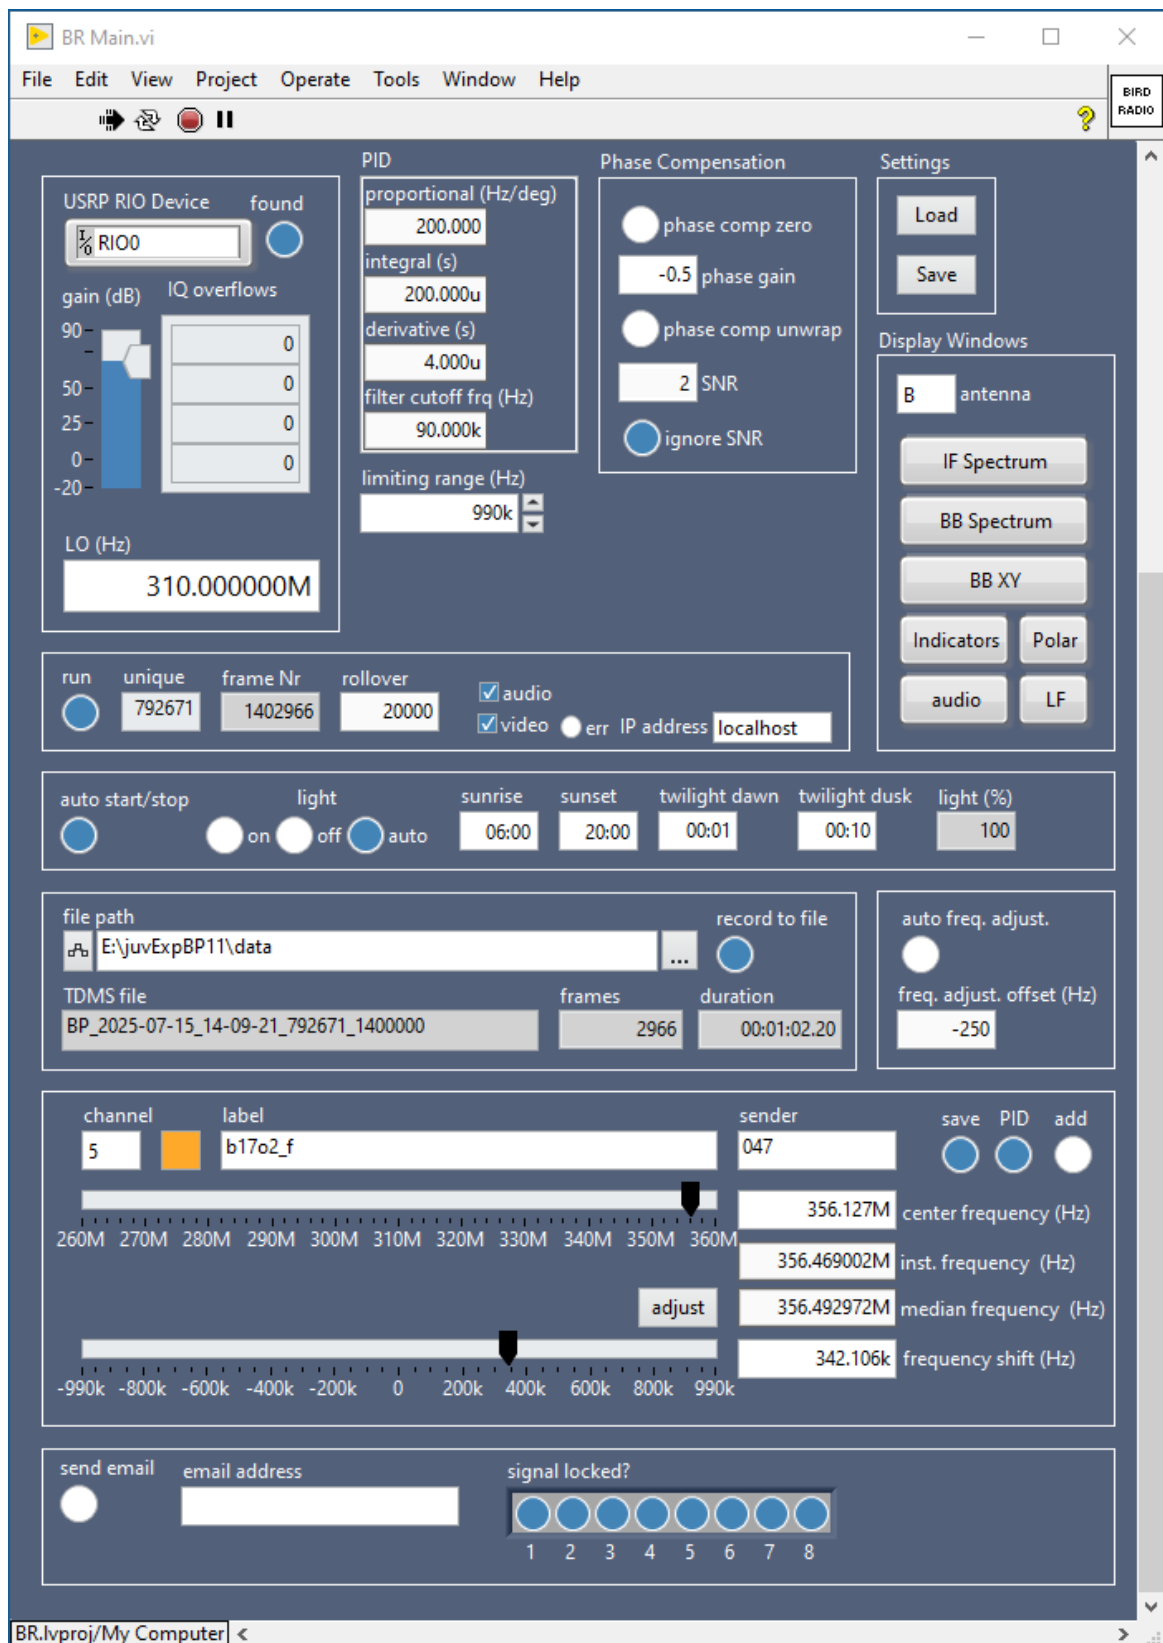

**Figure B. Main control panel of BirdRadio.** This panel is used to configure the radio preamplifier gains, the eight-channel radio demodulation, the frequency tracking, and the phase compensation. The panel also contains data acquisition start/stop controls.

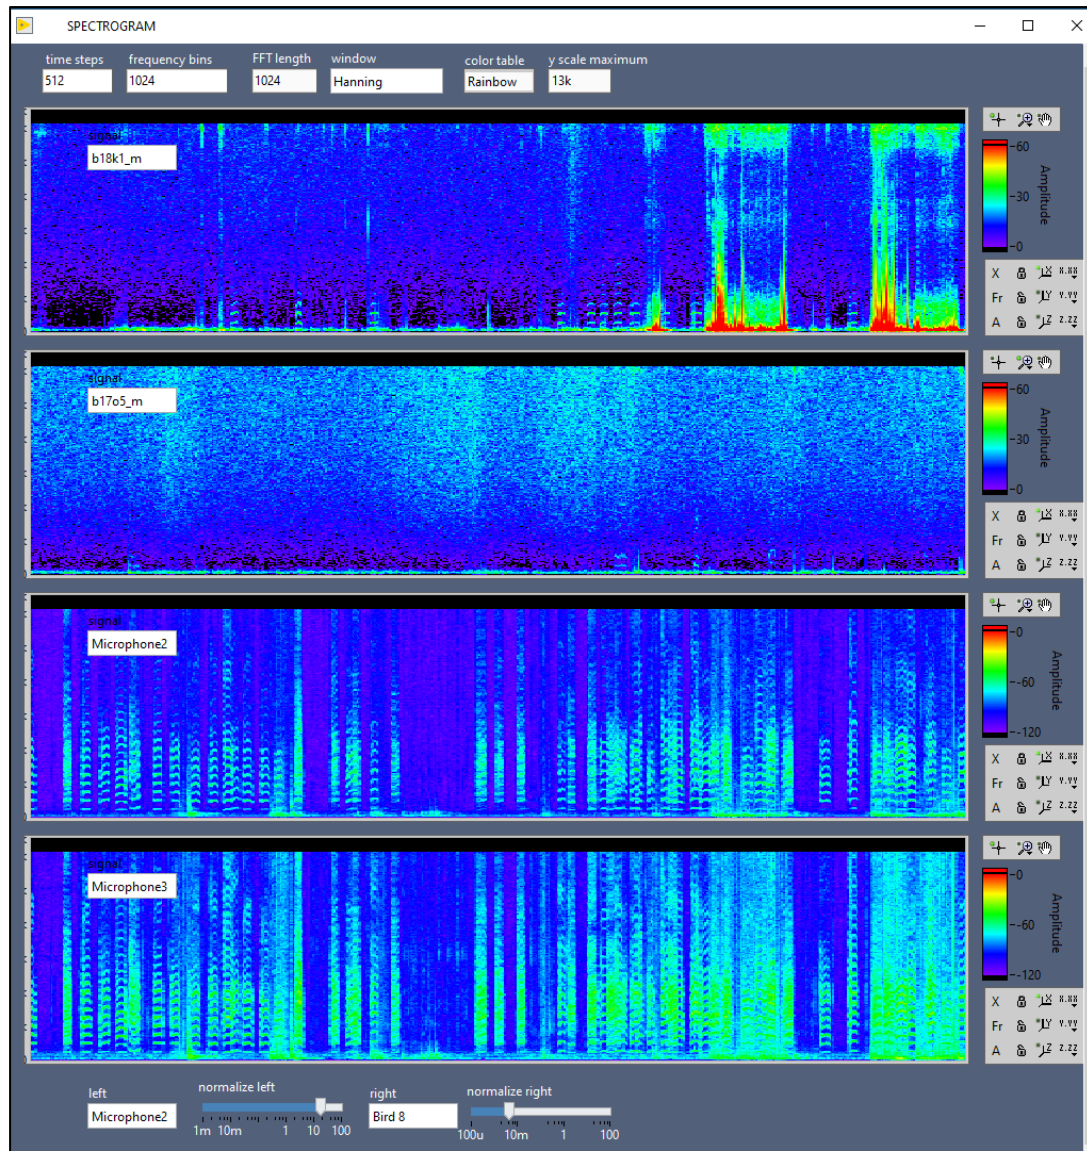

**Figure C.** Real-time spectrogram display of acceleration signal from bird-mounted transmitters (top two panels) and acoustic signals from wall-mounted microphones (bottom two panels).

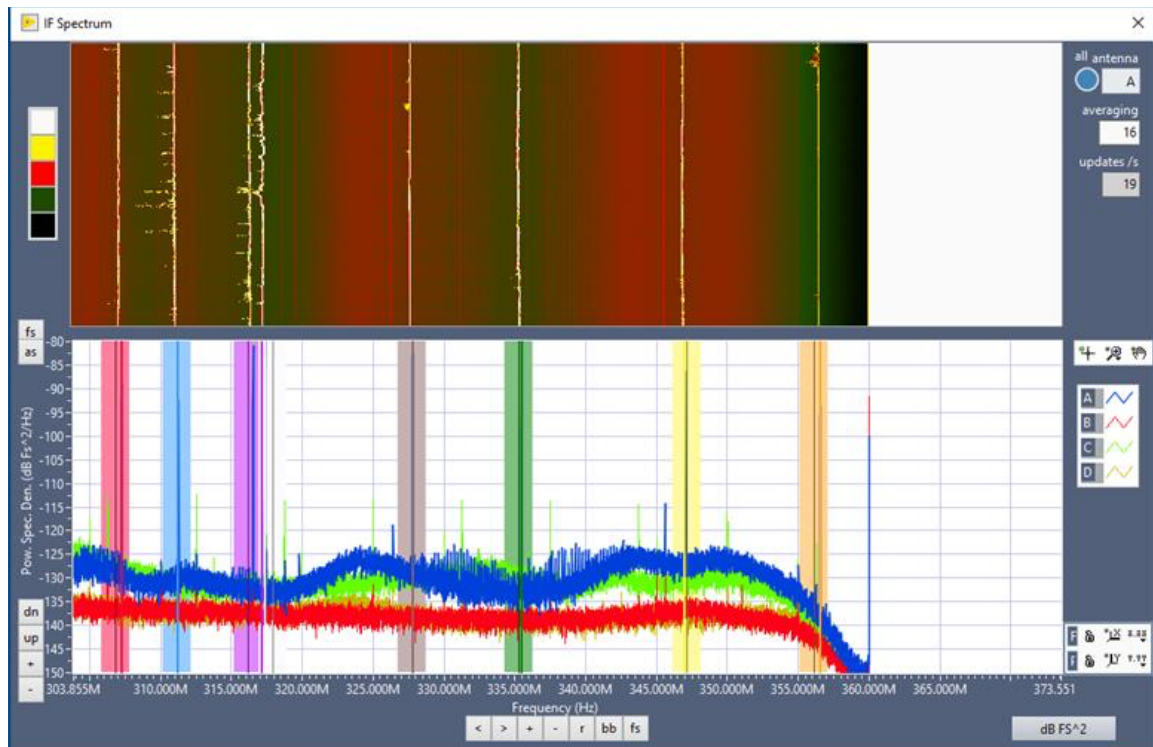

**Figure D. Intermediate frequency spectrum.** This panel shows the four antenna spectra A-D in distinct colors (blue, red, green, and orange), with eight baseband channels highlighted by colored (including white) vertical bands.

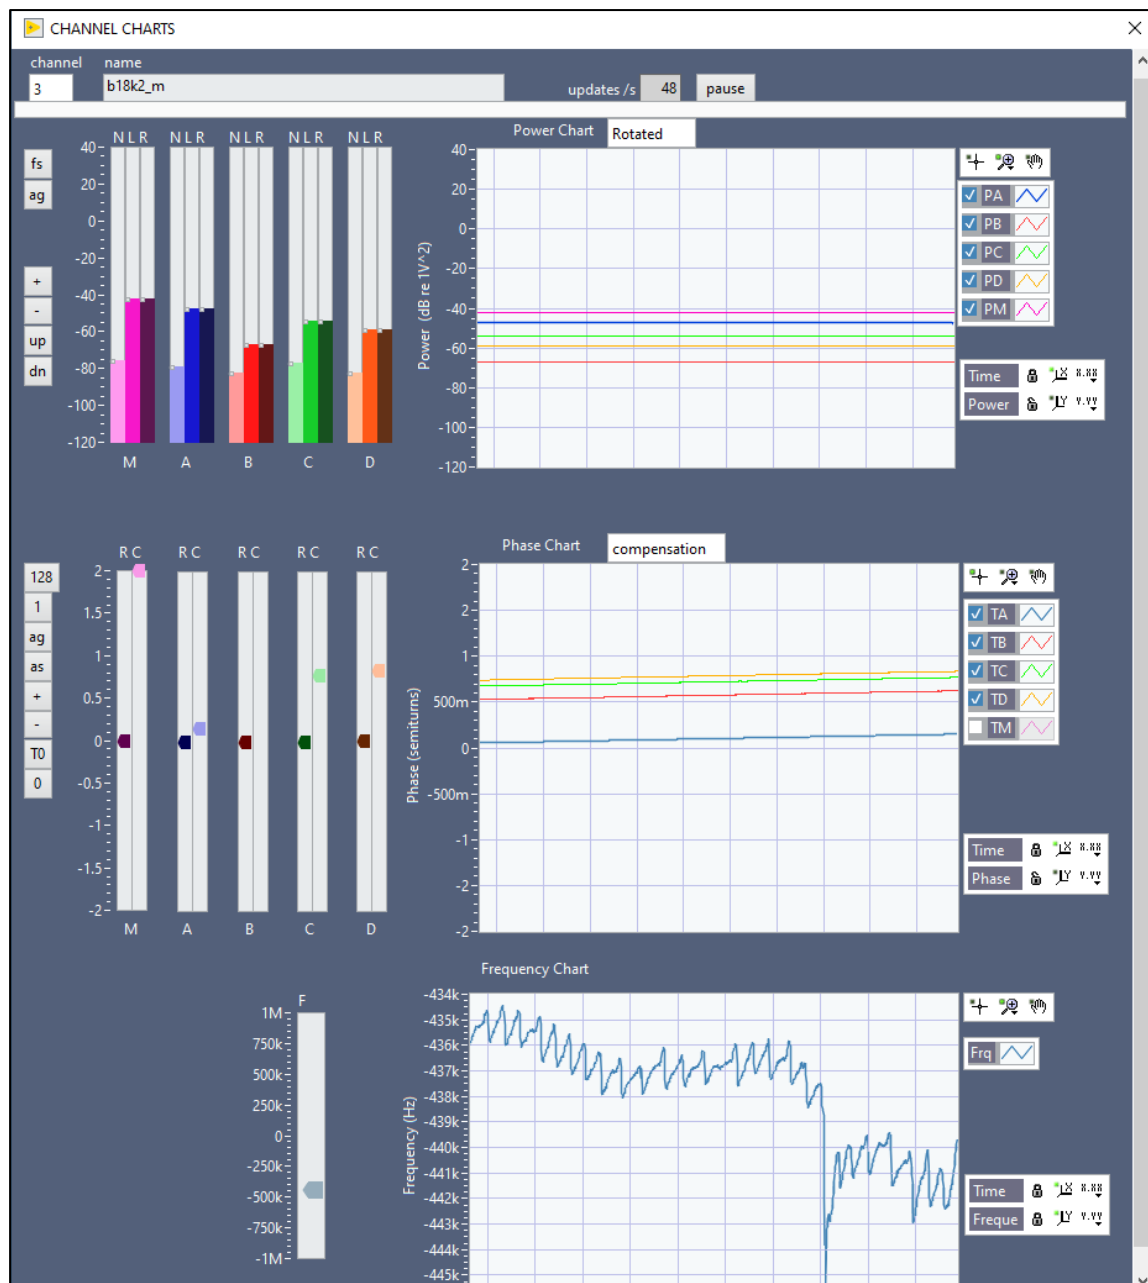

**Figure E. Single-channel monitor** used for displaying signal amplitudes (top panel), phase relationships (middle panel), and frequency shift (bottom panel).

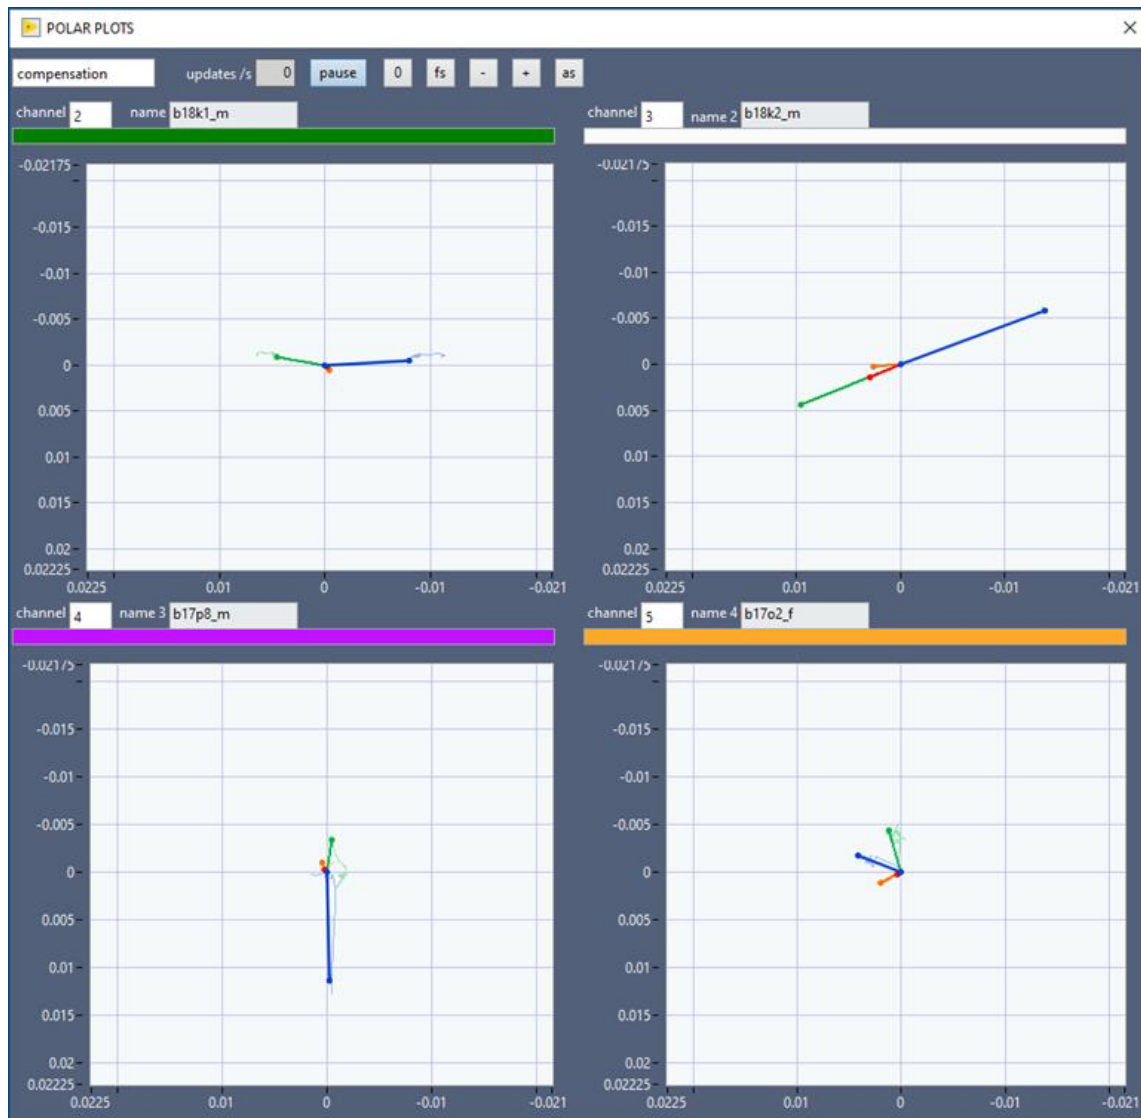

**Figure G. Vector plot visualization** of the signal amplitudes and compensation phases. The signals from the four antennas are indicated by colors (blue, red, green, and orange). The four panels show different channels (channels  $i = 1, \dots, 4$  from top left to bottom right).



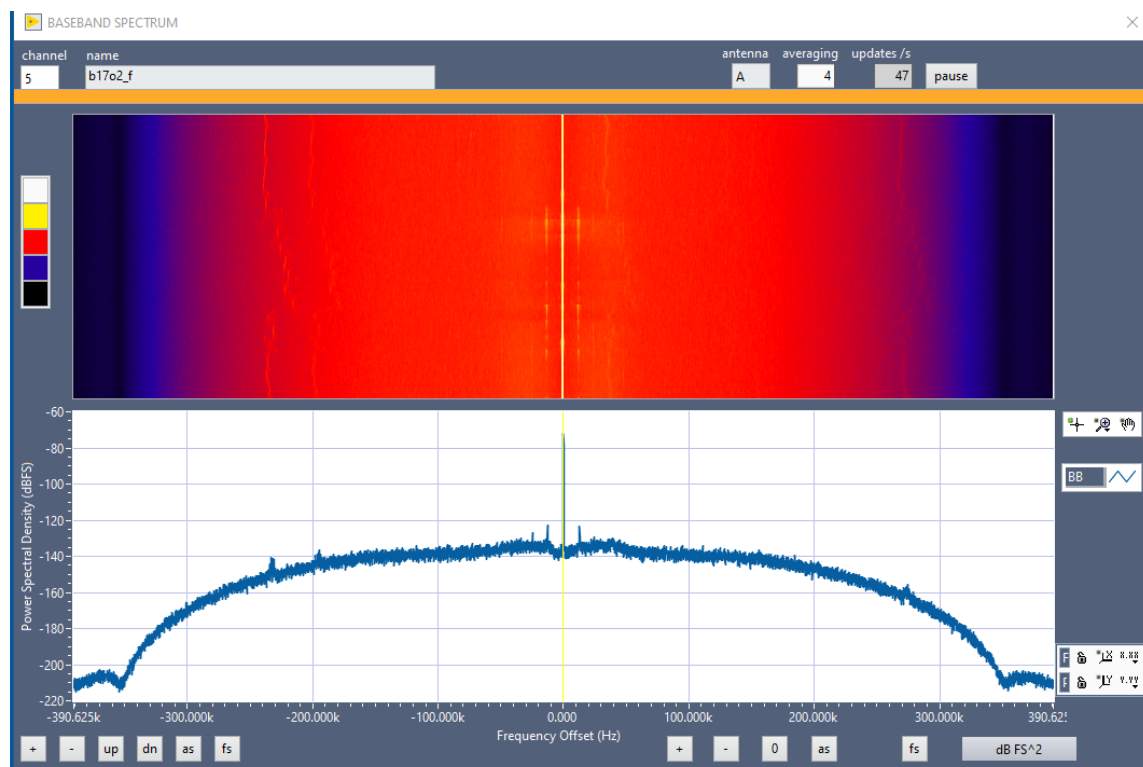

Figure H. Baseband frequency spectrum for channel 5.

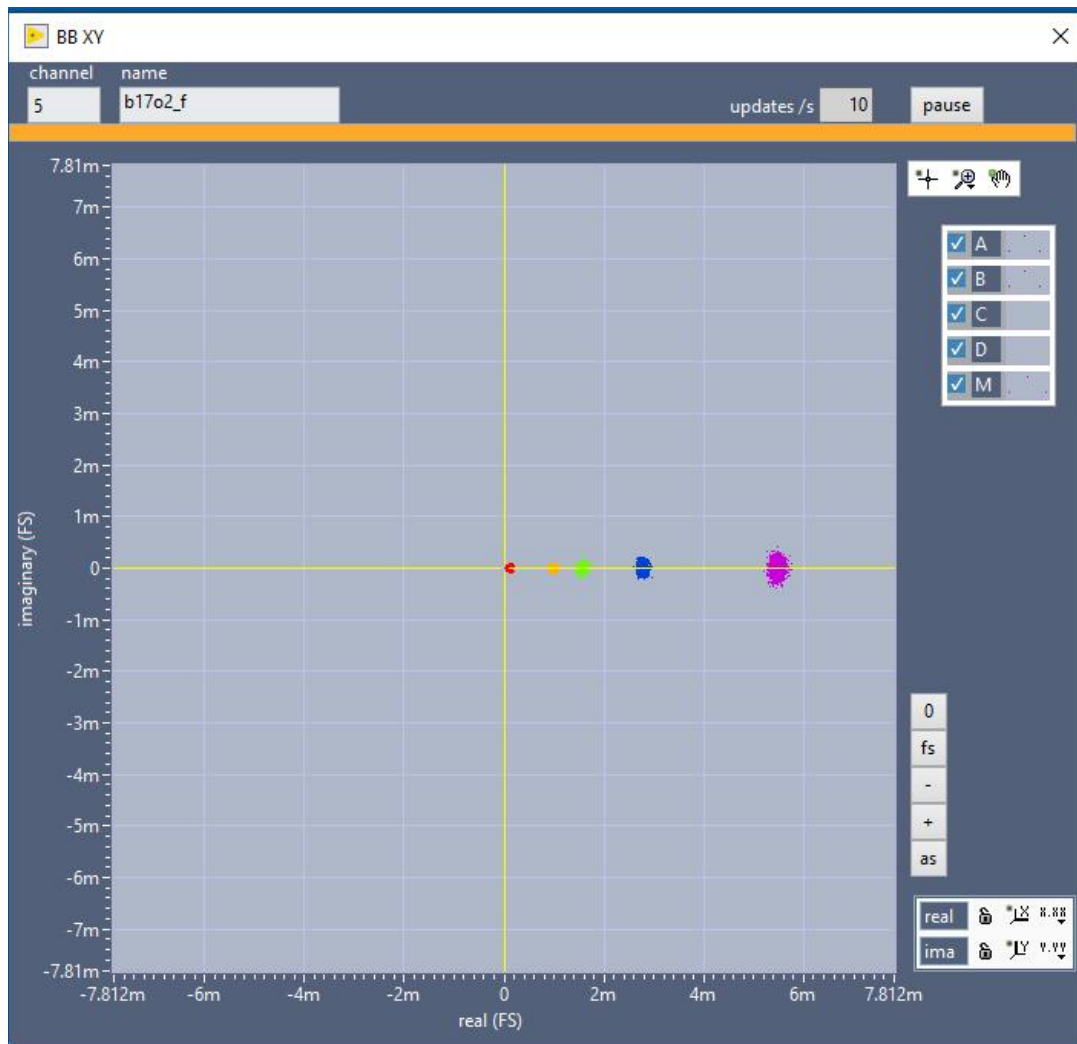

**Figure I. Scatter plot of baseband signals** associated with a given transmitter (channel 5), displaying data from all four antennas (blue, red, green, and orange) plus the combined main vector (magenta).
